# Supplementary material
Source: publisher figshare collection journal article supplement (https://gsajournals.figshare.com/ndownloader/files/13238849)
Supplement: Supplementary file 1 [file 13238849]

| **Gene Name** | **Forward Primer** | **Reverse Primer** | **Reference** |
| --- | --- | --- | --- |
| *tba-1* | GTACACTCCACTGATCTCTGCTGACAAG | CTCTGTACAAGAGGCAAACAGCCATG | Hoogewijs *et al.* 2008 |
| *cdc-42* | CTGCTGGACAGGAAGATTACG | CTCGGACATTCTCGAATGAAG | Hoogewijs *et al.* 2008 |
| *pmp-3* | GTTCCCGTGTTCATCACTCAT | ACACCGTCGAGAAGCTGTAGA | Hoogewijs *et al.* 2008 |
| *Hsp-4* | AGATGCCGCCAAGAATCAGC | TCGACGATCTTGAACGGCCAG |  |
| *Hsp-6* | CGTGGTGTTCCACAAGTCGAG | TCCTCAGCGGCATTCTTTTCG |  |
| *hsf-1* | TTTGCATTTTCTCGTCTCTGTC | TCTATTTCCAGCACACCTCGT | Baird *et al.* 2014 |
| *hsp-16.2* | TCCATCTGAGTCTTCTGAGATTGTTA | TGGTTTAAACTGTGAGACGTTGA | Baird *et al.* 2014 |
| F44E5.4 *(hsp-70)* | TGCACCAATCTGGACAATCT | TCCAGCAGTTCCAGGATTTC | Baird *et al.* 2014 |
| *dnj-13* | ACGATGTCATTAAGCCGGG | GAGTTGGATTGAGTTGTGATGG | Li *et al.* 2016 |
| *sti-1* | CATGTTCACTACGACAAAGCG | TCCAACTTCGACGGCTTTC | Li *et al.* 2016 |
| *hsp-60* | CGCCGTCTCTGTCACTATG | AGGTTCTGGTATTTGTCCTTGAG | Li *et al.* 2016 |
| *hsp-110* | ACTATTCTCTGCATGCCACTC | GGATCACTGAATTTTCGTCCAATC | Li *et al.* 2016 |

**References:**

Baird N. A., P. M. Douglas, M. S. Simic, A. R. Grant, J. J. Moresco *et al.*, 2014 HSF-1-mediated cytoskeletal integrity determines thermotolerance and life span. Science 346: 360–363.

Hoogewijs D., K. Houthoofd, F. Matthijssens, J. Vandesompele, and J. R. Vanfleteren, 2008 Selection and validation of a set of reliable reference genes for quantitative sod gene expression analysis in C. elegans. BMC Mol. Biol. 9: 9.

Li J., L. Chauve, G. Phelps, R. M. Brielmann, and R. I. Morimoto, 2016 E2F coregulates an essential HSF developmental program that is distinct from the heat-shock response. Genes Dev 30: 2062–2075.
